# Supplementary material
Source: PubMed Central journal article supplement (PMC7076223)
Supplement: supp_RA119.011053_155808_3_supp_469598_q554l4.pdf [file supp_RA119.011053_155808_3_supp_469598_q554l4.pdf]

## Supporting Information

### G9a mediates diminished expression of cannabinoid CB<sub>1</sub> receptors in primary sensory neurons in neuropathic pain

Yi Luo, Jixiang Zhang, Lin Chen, Shao-Rui Chen, Hong Chen, Guangfen Zhang, Hui-Lin Pan

#### Validation of CB<sub>1</sub>R Antibodies Using CB<sub>1</sub>R cKO Mice and Immunoblotting

##### Methods

CB<sub>1</sub>R (encoded by the *Cnr1* gene) conditional knockout (cKO) mice were generated by crossing female *Cnr1*<sup>fllox/fllox</sup> mice with male *Advillin*<sup>Cre/+</sup> mice. *Cnr1*<sup>fllox/fllox</sup> mice were produced as described previously (1). CB<sub>1</sub>R cKO mice were identified via genotyping, and a profound reduction in the mRNA level of CB<sub>1</sub>Rs in the DRG was confirmed using quantitative PCR.

Lumbar DRG tissues were obtained from adult wild-type and CB<sub>1</sub>R cKO mice, dissected, and homogenized in cold radioimmunoprecipitation assay lysis buffer containing 1% protease inhibitor cocktail (Sigma-Aldrich). After centrifugation (13,000 g for 20 min at 4 °C), the supernatants of the samples were collected. Equal amounts (30 µg) of proteins were separated by electrophoresis using a 4–12% gradient sodium dodecyl sulfate-polyacrylamide gel, transferred to a polyvinylidene fluoride membrane, and incubated in the blocking solution (5% nonfat dry milk) for 1 h. The following primary antibodies were used: rabbit anti-CB<sub>1</sub>R (1:600; #ACR-001, Alomone Labs, Jerusalem, Israel), rabbit anti-CB<sub>1</sub>R (1:1000; #10006590, Cayman Chemical, Ann Arbor, MI), rabbit anti-CB<sub>1</sub>R (1:2000; #AB\_2571593, Frontier Institute Co., Hokkaido, Japan), and anti-glyceraldehyde 3-phosphate dehydrogenase (GAPDH) (1:2,000; #5174, Cell Signaling Technology, Danvers, MA). The specificity of these anti-CB<sub>1</sub>R antibodies has been reported previously (2-4).

##### Results

Figure S1 below shows representative blotting images of the protein bands detected by the three CB<sub>1</sub>R antibodies in DRG tissues obtained from wild-type and CB<sub>1</sub>R cKO mice. The GAPDH protein band on the same gel was used as a loading control, and molecular weight markers are shown on the left of the blotting images. The three CB<sub>1</sub>R antibodies from Alomone Labs (A), Cayman Chemical (B), and Frontier Institute Co. (C) detected similar protein bands in the DRG tissues obtained from wild-type and CB<sub>1</sub>R cKO mice. Immunoblotting was repeated for each antibody using separate DRG samples at least three times. These findings indicate that the three antibodies tested are not specific for CB<sub>1</sub>R proteins.

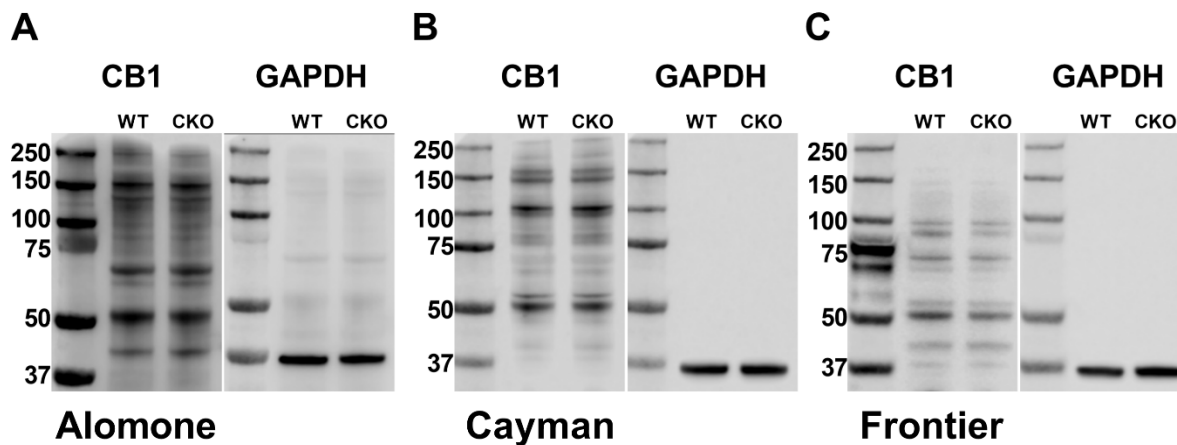

## Supplemental references

1. Mani, B. K., Castorena, C. M., Vianna, C. R., Lee, C. E., Metzger, N. P., Vijayaraghavan, P., Osborne-Lawrence, S., Elmquist, J. K., and Zigman, J. M. (2019) Combined Loss of Ghrelin Receptor and Cannabinoid CB1 Receptor in Mice Decreases Survival but does not Additively Reduce Body Weight or Eating. *Neuroscience*, doi: 10.1016/j.neuroscience.2019.1009.1005
2. Hajkova, A., Techlovska, S., Dvorakova, M., Chambers, J. N., Kumpost, J., Hubalkova, P., Prezeau, L., and Blahos, J. (2016) SGIP1 alters internalization and modulates signaling of activated cannabinoid receptor 1 in a biased manner. *Neuropharmacology* **107**, 201-214
3. Gonzalez-Islas, C., Garcia-Bereguain, M. A., and Wenner, P. (2012) Tonic and transient endocannabinoid regulation of AMPAergic miniature postsynaptic currents and homeostatic plasticity in embryonic motor networks. *The Journal of neuroscience : the official journal of the Society for Neuroscience* **32**, 13597-13607
4. Agarwal, N., Pacher, P., Tegeder, I., Amaya, F., Constantin, C. E., Brenner, G. J., Rubino, T., Michalski, C. W., Marsicano, G., Monory, K., Mackie, K., Marian, C., Batkai, S., Parolaro, D., Fischer, M. J., Reeh, P., Kunos, G., Kress, M., Lutz, B., Woolf, C. J., and Kuner, R. (2007) Cannabinoids mediate analgesia largely via peripheral type 1 cannabinoid receptors in nociceptors. *Nature neuroscience* **10**, 870-879
